# Supplementary material for: (20S) Ginsenoside Rh2 Exerts Its Anti-Tumor Effect by Disrupting the HSP90A-Cdc37 System in Human Liver Cancer Cells
Source: MDPI journal article supplement (doi:10.3390/ijms222313170), 2021-12-06
Supplement: s1 [file s1]

### Supplementary materials

**Table S1.** The network topology analysis of the overlapped genes between liver cancer related genes and (20S)G-Rh2 target proteins. Three topological indicators including degree of distribution, betweenness centrality, and closeness centrality represent the importance of these 25 genes in the background network of human genes. “Ratio R/S” represents the propensity of these 25 potential targets to bind (20S)G-Rh2 based on the mass spectrometry data, with a smaller ratio value representing a greater tendency to bind (20S)G-Rh2.

| Gene            | Degree | Betweenness Centrality | Closeness Centrality | Ratio R/S |
|-----------------|--------|------------------------|----------------------|-----------|
| <i>STAT3</i>    | 108    | 0.17989041             | 0.42120344           | 0.943045  |
| <i>HSP90AA1</i> | 91     | 0.06761578             | 0.4091858            | 0.565545  |
| <i>TRIP13</i>   | 83     | 0.15713539             | 0.37716485           | 0.726409  |
| <i>HSPB1</i>    | 44     | 0.04918154             | 0.36865204           | 0.732591  |
| <i>SFN</i>      | 42     | 0.05349587             | 0.37837838           | 0.905909  |
| <i>ACTB</i>     | 40     | 0.03128229             | 0.38181818           | 0.956295  |
| <i>KRT18</i>    | 34     | 0.02438184             | 0.37191651           | 0.791659  |
| <i>NPM1</i>     | 33     | 0.04089923             | 0.34406085           | 0.684182  |
| <i>HSPA5</i>    | 31     | 0.03642254             | 0.34690265           | 0.401864  |
| <i>ITGB1</i>    | 20     | 0.02094208             | 0.32272228           | 0.681409  |
| <i>KRT8</i>     | 15     | 0.00602339             | 0.33295583           | 0.742864  |
| <i>HSPA9</i>    | 14     | 0.01784429             | 0.3442623            | 0.447409  |
| <i>MSH2</i>     | 13     | 0.00579711             | 0.31160572           | 0.513909  |
| <i>HSPA4</i>    | 12     | 0.00944665             | 0.34854772           | 0.553795  |
| <i>PHB</i>      | 12     | 0.00667437             | 0.33220339           | 0.595886  |
| <i>HSP90B1</i>  | 10     | 0.0028511              | 0.30561331           | 0.739227  |
| <i>ANXA2</i>    | 6      | 0.0013638              | 0.30753138           | 0.577295  |
| <i>IQGAP1</i>   | 6      | 0.00076746             | 0.30371901           | 0.605591  |
| <i>COX5A</i>    | 6      | 0.00552004             | 0.28201439           | 0.918659  |
| <i>CD44</i>     | 5      | 0.00379146             | 0.28543689           | 0.602045  |
| <i>FASN</i>     | 4      | 0.00403451             | 0.27735849           | 0.355182  |
| <i>MSH6</i>     | 4      | 0.00027764             | 0.28296439           | 0.837250  |
| <i>BSG</i>      | 2      | 0.00010345             | 0.2527945            | 0.270114  |
| <i>LRRC59</i>   | 2      | 0.00006077             | 0.26320501           | 0.996250  |
| <i>PC</i>       | 0      | 0                      | 0                    | 0.766182  |

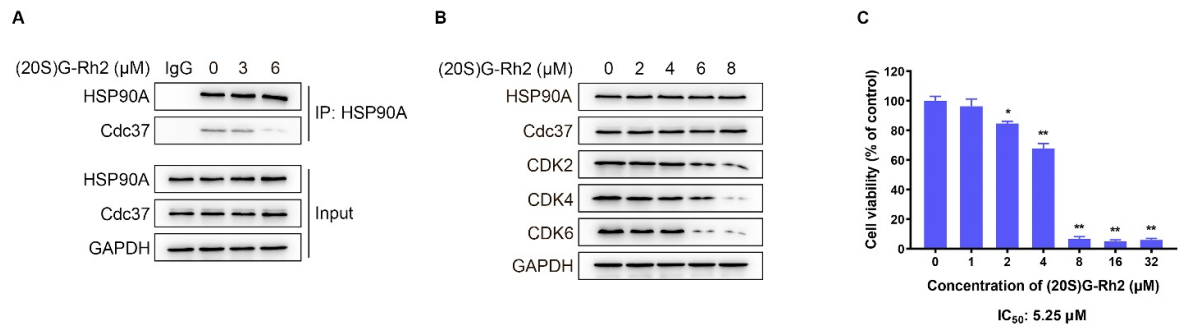

**Figure S1.** (20S)G-Rh2-induced interaction disruption of HSP90A and Cdc37, degradation of CDKs, and anti-proliferation effect of SK-HEP-1 cells. (A) Immunoprecipitation was performed with whole-cell lysate under treatment with the indicated concentrations of (20S)G-Rh2 for 24 h, and the interaction was analyzed by an immunoblot. (B) Protein levels of CDKs in SK-HEP-1 cells treated with (20S)G-Rh2 were determined by an immunoblot. (C) SK-HEP-1 cells were treated with the indicated concentrations of (20S)G-Rh2 for 48 h, and the cell viability was determined by MTT assay. All data are shown as the mean  $\pm$  SD of experiments performed in triplicate. A two-tail Student's *t*-test was used for statistical analyses (\* $p$  < 0.01, \*\* $p$  < 0.001).

**Table S2.** Primers for vector construction.

| Primer Description | Sequence                                             |
|--------------------|------------------------------------------------------|
| HSP90A_N-F         | 5'- CGGGATCCATGGAGGAGGAGGAGGTTGAGAC -3'              |
| HSP90A_N-R         | 5'- GCCTCGAGATTTCAGGTTTGTCTTCCGACTCTTTC -3'          |
| HSP90A_MC-F        | 5'- CGGGATCCGAAGAGCTCAACAAAACAAAGCCCCATC -3'         |
| HSP90A_MC-R        | 5'- GCCTCGAGATAAGGGGTGGCATTCTTCAGTTACAG -3'          |
| MC_R413V-F         | 5'- GCAAAATTTTGAAAGTTATCGTTAAGAATTTGGTCAAAAAATGC -3' |
| MC_R413V-R         | 5'- GCATTTTTTGACCAAATTCTTAACGATAACTTTCAAATTTTGC -3'  |
| MC_Q454E-F         | 5'- CTTGGAATACACGAAGACTCTGAAAATCGGAAGAAG -3'         |
| MC_Q454E-R         | 5'- CTCTTCCGATTTTCAGAGTCTTCGTGTATTCCAAG -3'          |

**Table S3.** Primers for qRT-PCR.

| Gene Name | Sequence                        |
|-----------|---------------------------------|
| CDK2-F    | 5'- ATGGATGCCTCTGCTCTCACTG -3'  |
| CDK2-R    | 5'- CCCGATGAGAATGGCAGAAAGC -3'  |
| CDK4-F    | 5'- CCATCAGCACAGTTCGTGAGGT -3'  |
| CDK4-R    | 5'- TCAGTTCGGGATGTGGCACAGA -3'  |
| CDK6-F    | 5'- GGATAAAGTTCCAGAGCCTGGAG -3' |
| CDK6-R    | 5'- GCGATGCACTACTCGGTGTGAA -3'  |
| ACTB-F    | 5'- CACCATTGGCAATGAGCGGTTTC -3' |
| ACTB-R    | 5'- AGGTCTTTGCGGATGTCCACGT -3'  |
